# Supplementary material for: The genomic regulatory control of skeletal morphogenesis in the sea urchin
Source: Oxford University Press journal article supplement (doi:10.1242/dev.073049), 2011-12-22
Supplement: dev073049tables3.pdf [file dev073049tables3.pdf]

**Table S3. Newly identified components of the PMC GRN**

| Protein           | Biochemical function           | Motifs (NCBI CDD)                                                                                                             | Notes                                                                                                                                                                                                                                                                                                                                                           |
|-------------------|--------------------------------|-------------------------------------------------------------------------------------------------------------------------------|-----------------------------------------------------------------------------------------------------------------------------------------------------------------------------------------------------------------------------------------------------------------------------------------------------------------------------------------------------------------|
| $\alpha$ -Actinin | Actin crosslinking protein     | a) Calponin homology (2)<br>b) EF hand<br>c) Spectrin repeats                                                                 | $\alpha$ -actinin functions to bundle actin filaments.                                                                                                                                                                                                                                                                                                          |
| Alx4              | Transcription factor           | a) Homeodomain (1)<br>b) OAR domain (1)                                                                                       | The <i>alx4</i> gene is closely linked to <i>alx1</i> . The gene is expressed by PMCs during gastrulation, but later by NSM cells in the coelomic pouches.                                                                                                                                                                                                      |
| Arp1              | Binds ATP and several proteins | Actin-related protein                                                                                                         | Arp1 is a component of the dynactin complex, which regulates cytoplasmic dynein activity (1).                                                                                                                                                                                                                                                                   |
| Arp3              | Binds ATP and several proteins | Actin-related protein                                                                                                         | Arp3 is a component of the ARP (Arp2/3) complex, which regulates the nucleation of actin filaments (2).                                                                                                                                                                                                                                                         |
| Calumenin         | Calcium binding protein        | a) ER signal sequence<br>b) EF hand (one or more depending on stringency)<br>c) HEDF ER retention signal                      | The ER retention signal of mammalian CALU is only partially functional and some protein is secreted. CALU interacts with thrombospondin (3). There are other CALU-like proteins in <i>S. purpuratus</i> but this is the closest BLAST match to human CALU.                                                                                                      |
| Casc1             | Unknown                        | None                                                                                                                          | Casc1 (cancer susceptibility candidate 1) is highly conserved in diverse metazoans and has some similarity to a flagellar dynein subunit (4). There is evidence of early embryonic expression in several species. There are no closely related genes in <i>S. purpuratus</i> .                                                                                  |
| Can1              | Carbonic anhydrase             | a) ER signal sequence<br>b) CA superfamily<br>c) GPI anchor                                                                   | Carbonic anhydrases catalyze the reversible hydration of carbon dioxide. There are at least 19 carbonic anhydrase genes in sea urchins.                                                                                                                                                                                                                         |
| Cdc42             | GTPase                         | Ras-like GTPase                                                                                                               | Cdc42 acts as a molecular switch that transduces signals to the cytoskeleton; among its functions is the activation of Wasp. Cdc42 activity is associated with filopodium formation in several cell types (5, 6).                                                                                                                                               |
| Cdi               | Unknown                        | None                                                                                                                          | Cdi is a basic, arg/ser-rich protein with very weak similarity to cyclin-dependent kinase inhibitors, There are no closely related genes in <i>S. purpuratus</i> .                                                                                                                                                                                              |
| Cofilin           | Actin binding protein          | ADF superfamily                                                                                                               | Cofilin regulates the dynamic assembly/disassembly of actin filaments.                                                                                                                                                                                                                                                                                          |
| Ctd               | Phosphatase                    | HAD superfamily                                                                                                               | This gene model lacks the N-terminus of the protein. There are several related hydrolase domain (1) proteins in <i>S. purpuratus</i> . Ctd closely resembles human SCPs; small ser/thr phosphatases that play a role in regulating the activity of specific transcription factors. These enzymes are related to CTD (C-terminal domain of RNAPIII) phosphatase. |
| EGF-rich/P41      | Matrix protein                 | a) ER signal seq<br>b) VWA matrilin (2)<br>c) EGF (1)                                                                         | Other motif prediction programs (Pfam and ExPASy) find 9-16 EGF repeats in this protein. There are many EGF domain-containing proteins in <i>S. purpuratus</i> . The most closely related proteins in vertebrates are fibrillins/matrilins.                                                                                                                     |
| Elav              | RNA binding protein            | RRM (4)                                                                                                                       | Elav proteins have been implicated in gene regulation and cell differentiation via post-transcriptional mechanisms in diverse organisms. There are other RRM-containing RNA-binding protein in <i>S. purpuratus</i> but this is the closest BLAST match to human Elav.                                                                                          |
| Fos               | Transcription factor           | bZIP (1)                                                                                                                      | Fos can dimerize with Jun to form the AP-1 transcription factor complex. Jun is also enriched in PMCs. Fos has been shown to play a role in many types of cells that, like PMCs, are invasive and motile (7, 8).                                                                                                                                                |
| Lasp1             | Actin binding phosphoprotein   | a) LIM (1)<br>b) nebulin (1)<br>c) SH3 (1)                                                                                    | A second, closely related <i>lasp</i> gene is located within a large intron of this gene. Lasp proteins are enriched in cell protrusions and have been implicated in cell migration (9).                                                                                                                                                                        |
| Pks2              | Type I polyketide synthase     | a) ketoacylsynthase (1)<br>b) acyltransferase (1)<br>c) dehydrogenase (1)<br>d) ketoacyl reductase (1)<br>e) thioesterase (1) | PKSs are multifunctional enzymes that carry out the biosynthesis of a wide variety of polyketides. Phylogenetic analysis of sea urchin <i>pks</i> genes has been carried out by Castoe et al. (10).                                                                                                                                                             |
| P11               | Unknown                        | ER signal sequence                                                                                                            | P11 is a small (101 aa), basic, cysteine-rich, secreted protein. There are no strong BLAST matches to any other proteins in any organism.                                                                                                                                                                                                                       |
| P16rel1           | Biomineralization protein      | a) ER signal sequence<br>b) Transmembrane (1)                                                                                 | P16rel1 is an acidic, serine-rich protein, similar to P16 (11) in general features. The <i>p16rel1</i> gene is located ~100 kb from <i>p16</i> . There are no apparent orthologs outside the echinoderms.                                                                                                                                                       |
| P16rel2           | Biomineralization protein      | a) ER signal sequence<br>b) Transmembrane (1)                                                                                 | P16rel2 is a basic protein with glycine- and proline-rich repeats that resemble those found in spicule matrix                                                                                                                                                                                                                                                   |

|                   |                                         |                                                                            |                                                                                                                                                                                                                                                                                                             |
|-------------------|-----------------------------------------|----------------------------------------------------------------------------|-------------------------------------------------------------------------------------------------------------------------------------------------------------------------------------------------------------------------------------------------------------------------------------------------------------|
|                   |                                         |                                                                            | proteins. The <i>p16rel2</i> gene is directly adjacent to <i>p16</i> . There are no apparent orthologs outside the echinoderms.                                                                                                                                                                             |
| P21-arc           | ARC complex protein                     | None                                                                       | P21-arc (ARPC3) is a subunit of the ARP (Arp2/3) complex, which regulates the nucleation of actin filaments (2).                                                                                                                                                                                            |
| P58A/B            | Unknown                                 | a) ER signal sequence<br>b) Transmembrane (1)                              | The <i>p58a</i> and <i>p58b</i> genes are immediately adjacent to one another. The corresponding proteins are 63% similar at the amino acid level. P58A and P58B are more similar to each other than to any other proteins in <i>S. purpuratus</i> . Both proteins are required for biomineralization (12). |
| P133              | Unknown                                 | a) LamG (at least four)<br>b) EGF (at least three)<br>c) Transmembrane (1) | This gene model lacks the N-terminus of the protein. Combinations of EGF and LamG domains are found in a number of cell adhesion molecules and ECM receptors, including neurexin and some cadherins.                                                                                                        |
| Smad1/5/8         | Transcription factor                    | a) MH1 (1)<br>b) MH2 (2)                                                   |                                                                                                                                                                                                                                                                                                             |
| SM20              | Spicule matrix protein                  | C-type lectin (1)                                                          | This gene is clustered with sm29 and sm21. The SM20 protein is found in purified spicules (13).                                                                                                                                                                                                             |
| SM49              | Spicule matrix protein                  | C-type lectin (1)                                                          | SM49 is found in purified spicules (13).                                                                                                                                                                                                                                                                    |
| $\beta$ -Spectrin | Actin crosslinking protein              | a) Calponin homology (2)<br>b) Spectrin repeats                            | $\alpha$ -Spectrin is also enriched in PMC (14).                                                                                                                                                                                                                                                            |
| Stomatin          | Membrane/lipid raft protein             | a) Band 7/stomatin (1)<br>b) Transmembrane (1)                             | Stomatin is a conserved, widely-expressed, integral membrane protein that may regulate membrane transporters or ion channels (15). <i>S. purpuratus</i> has a cluster of eight tandem, highly similar <i>stomatin</i> genes, several of which are expressed by PMCs.                                        |
| Talin             | $\beta$ -integrin/actin binding protein | a) FERM (1)<br>b) I/L-WEQ (2)                                              | One of the functions of talin is to bind to $\beta$ -integrin. Three $\beta$ -integrins ( $\beta$ C, $\beta$ D, and $\beta$ G) are represented in the PMC EST collection (supplementary material Table S1) and all have talin-binding motifs (16).                                                          |
| Tsp               | Unknown                                 | a) ER signal sequence<br>b) Thrombospondin type 1 (1)                      | Tsp is a small (123 aa), secreted protein. An adjacent gene (NCBI LOC593393, GLEAN3_09954) encodes a very similar (but distinct) protein with an ER signal sequence and thrombospondin repeat.                                                                                                              |
| Vigilin           | RNA binding protein                     | KH type I (14)                                                             | Vigilin is conserved from yeast to mammals and has been implicated in heterochromatin formation and mRNA stability/translation (17).                                                                                                                                                                        |
| Wasp              | Binds multiple proteins                 | CRIB (1)                                                                   | WASP regulates the organization of the actin cytoskeleton by binding to actin, the Arp2/3 complex, and other proteins; it is activated by binding to Cdc42.                                                                                                                                                 |

#### References

- (1) Schroer, 2004
- (2) Pollard; 2007.
- (3) Honoré; 2009.
- (4) Wirschell et al., 2009.
- (5) Ahmed et al., 2010.
- (6) Mellor; 2010.
- (7) Ozanne et al., 2007.
- (8) Sherwood, 2006.
- (9) Raman et al., 2010.
- (10) Castoe et al., 2007.
- (11) Cheers and Etensohn, 2005.
- (12) Adomako-Ankomah and Etensohn, 2011.
- (13) Mann et al., 2010.
- (14) Wessel and Chen; 1993.
- (15) Kadurin et al., 2009.
- (16) Whittaker et al., 2006).
- (17) Zhou et al., 2008.
